# Supplementary material
Source: PubMed Central journal article supplement (PMC4160401)
Supplement: NIHMS602359-supplement-01.pdf [file NIHMS602359-supplement-01.pdf]

Supplementary Table 1. Unique proteins identified by 1DE gel and LC/MS-based shotgun proteomics

| Protein ID | Genbank Accession | Definition                                                                                                                           |
|------------|-------------------|--------------------------------------------------------------------------------------------------------------------------------------|
| AMYS_HUMAN | NP_001008219      | salivary amylase alpha 1B precursor                                                                                                  |
| PIP_HUMAN  | NP_002643         | prolactin-induced protein                                                                                                            |
| V00494_1   | NP_000468         | albumin preproprotein                                                                                                                |
| CYTS_HUMAN | NP_001890         | cystatin S precursor                                                                                                                 |
| M18786_1   | NP_001008222      | salivary amylase alpha 1A precursor                                                                                                  |
| AB020851_1 | NP_015568         | deleted in malignant brain tumors 1 isoform b precursor                                                                              |
| AF067420_1 | AAC19365          | SNC73 protein                                                                                                                        |
| A00279_1   | CAA00844          | human serum albumin [synthetic construct]                                                                                            |
| VEGP_HUMAN | NP_002288         | lipocalin 1 precursor                                                                                                                |
| 1c43A      | 1C43_A            | Chain A, Mutant Human Lysozyme With Foreign N-Terminal Residues.                                                                     |
| M24559_1   | AAB20203          | transmembrane secretory component; poly-Ig receptor;                                                                                 |
| AF332168_1 | AAG48753          | lactoferrin precursor [Homo sapiens]                                                                                                 |
| 8fabA      | 8FAB_A            | Chain A, Crystal Structure Of The Fab Fragment From The Human<br>Mveloma Immunoglobulin Ig $\gamma$ Hil At 1.8 Angstroms Resolution. |
| A21385_1   | A21385            | Plasmid DNA with human cDNA insert                                                                                                   |
| U63836_1   | AAB61398          | high molecular weight salivary mucin MG1                                                                                             |
| AL139415_3 | NP_001419         | enolase 1                                                                                                                            |
| PIHUSC     | NP_001103683      | proline-rich protein HaeIII subfamily 2                                                                                              |
| AF253321_1 | NP_002449         | mucin 5, subtype B, tracheobronchial                                                                                                 |
| AB023143_1 | BAA76770          | KIAA0926 protein                                                                                                                     |
| AF072844_1 | AAD47911          | membrane protein DAP10                                                                                                               |
| AF180681_1 | AAF36817          | guanine nucleotide exchange factor                                                                                                   |
| X02537_1   | AAA58678          | hemopexin                                                                                                                            |
| S80916_1   | AAI28192          | PRB4 protein                                                                                                                         |
| AF176832_1 | AAF70379          | low density lipoprotein receptor related protein-deleted in tumor                                                                    |
| AL355392_1 | CAM20890          | chromosome 20 open reading frame 114                                                                                                 |
| X83413_54  | PQ0855            | glycoprotein BHLF2 - human herpesvirus 6 (strain U1102) (fragment)                                                                   |
| IGJ_HUMAN  | NP_653247         | immunoglobulin J chain                                                                                                               |
| ALK1_HUMAN | NM_003064         | Homo sapiens secretory leukocyte peptidase inhibitor (SLPI), mRNA                                                                    |
| TRFE_HUMAN | NP_001054         | transferrin                                                                                                                          |
